# Supplementary material
Source: PubMed Central journal article supplement (PMC6219394)
Supplement: NIHMS927262-supplement-supplement_1.pdf [file NIHMS927262-supplement-supplement_1.pdf]

## SUPPLEMENTARY ONLINE DATA

# Enhancement of mDia2 activity by Rho-kinase-dependent phosphorylation of the diaphanous autoregulatory domain

Dean P. STAUS, Joan M. TAYLOR and Christopher P. MACK<sup>1</sup>

Department of Pathology and Laboratory Medicine, University of North Carolina, Chapel Hill, NC 27599, U.S.A.

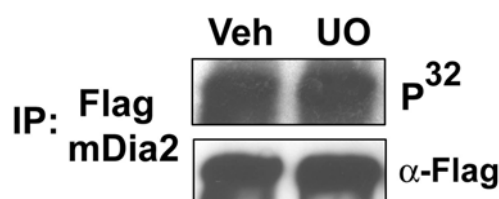

**Figure S1** mDia2 is not phosphorylated by MAPK

Cos-7 cells were transfected with full-length FLAG-mDia2. Cells were pre-treated with the MAPK inhibitor UO-126 (UO) or vehicle (Veh) and then labelled with [<sup>32</sup>P]P<sub>i</sub> for 2 h. mDia2 immunoprecipitants were run on an SDS/PAGE gel and analysed by autoradiography and Western blotting.

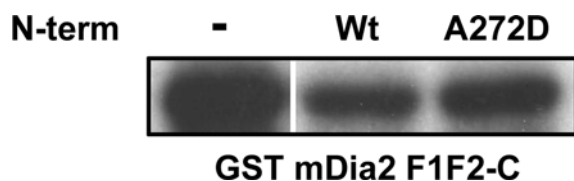

**Figure S2** The auto-inhibitory interaction attenuates mDia2 phosphorylation

GST-mDia2 FH1FH2-C ± the indicated mDia2 N-terminal fragment was incubated *in vitro* with constitutively active ROCKΔ3 and 10 μCi of [<sup>32</sup>P]ATP. After removing unincorporated <sup>32</sup>P, reactions were run on an SDS/PAGE gel and exposed to film. Wt, wild-type.

Received 15 October 2010/6 June 2011; accepted 24 June 2011

Published as BJ Immediate Publication 24 June 2011, doi:10.1042/BJ20101700

<sup>1</sup> To whom correspondence should be addressed (email cmack@med.unc.edu).
